# Supplementary material for: A Core–Shell Microneedle Platform for the Spatiotemporal Codelivery of Dual-Agent Therapeutics Precisely Orchestrates Diabetic Wound Healing
Source: Research Square preprint supplement (doi:10.21203/rs.3.rs-7689935/v1), 2025-10-09
Supplement: Supplementary file 1 [file 09399988e207e96255ad8da1.docx]

**Supporting Information**

A Core–Shell Microneedle Platform for the Spatiotemporal Codelivery of Dual-Agent Therapeutics Precisely Orchestrates Diabetic Wound Healing

*Yuhang Zhan1, Zhihan Zhang1, Zhiyue Zhang1, Mengru Lin, Hui Liu, Dilihumaer·Abulimiti, Shami·Aihemaiti, Yun Kan, Jinhai Tan*, Xi Chen*, Shengxiang Tao**

**A.** Yuhang Zhan, Zhihan Zhang, Hui Liu, Dilihumaer·Abulimiti, Shami·Aihemaiti, Yun Kan, Jinhai Tan, Xi Chen, Shengxiang Tao

Department of Orthopedics Trauma and Microsurgery, Zhongnan Hospital, Wuhan University, Wuhan, 430071, China

E-mail: [taoshengxiang@whu.edu.cn](mailto:taoshengxiang@whu.edu.cn)

**B.** Zhiyue Zhang

School of Basic Medicine, Peking Union Medical College, Beijing, China

**C.** Mengru Lin

College of Chemistry and Molecular Sciences, Wuhan University, Wuhan, 430072, China.


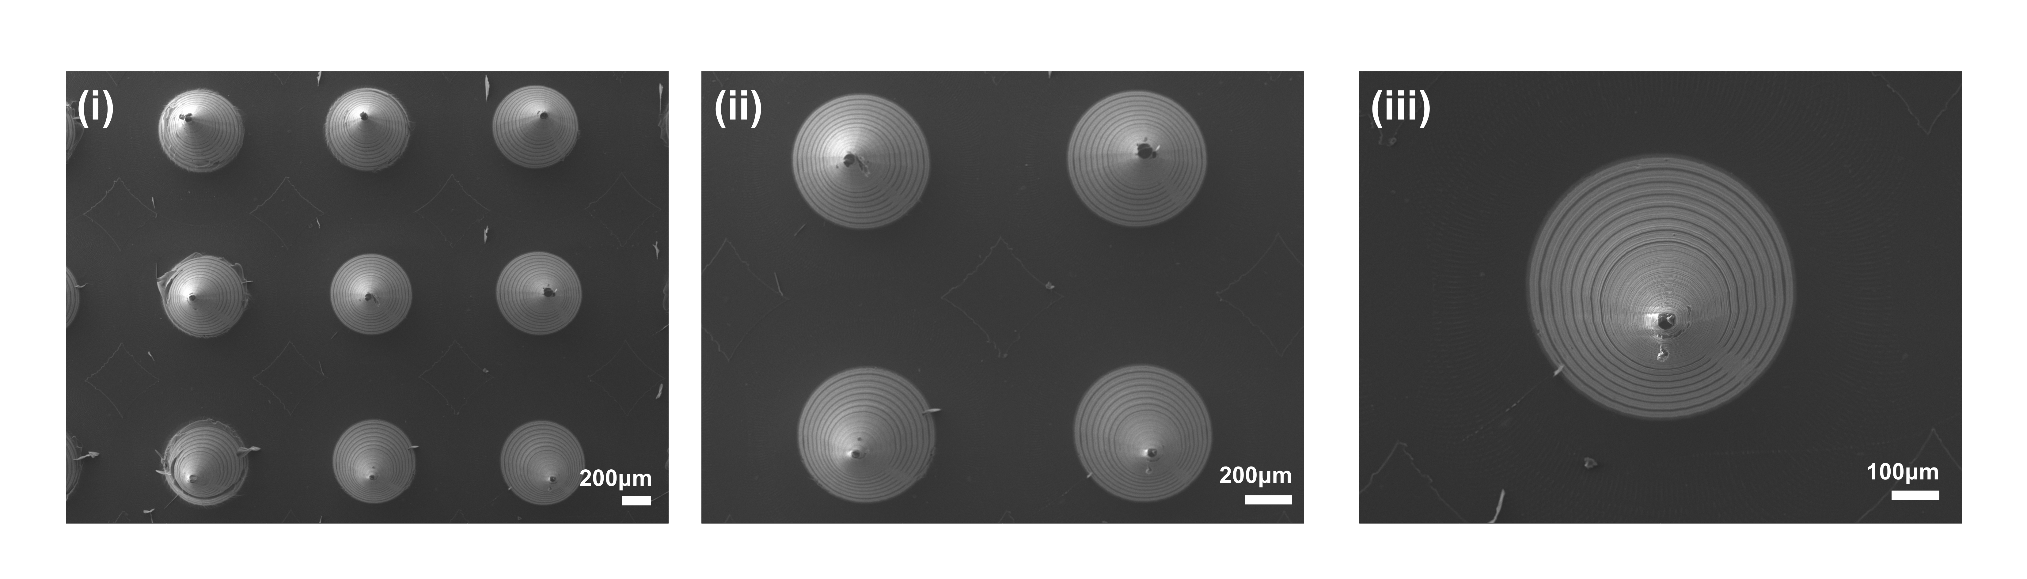


Fig. S1: SEM images of MN@Ple/ExoQ10 patch (Scale bar: 200 μm and 100 μm).


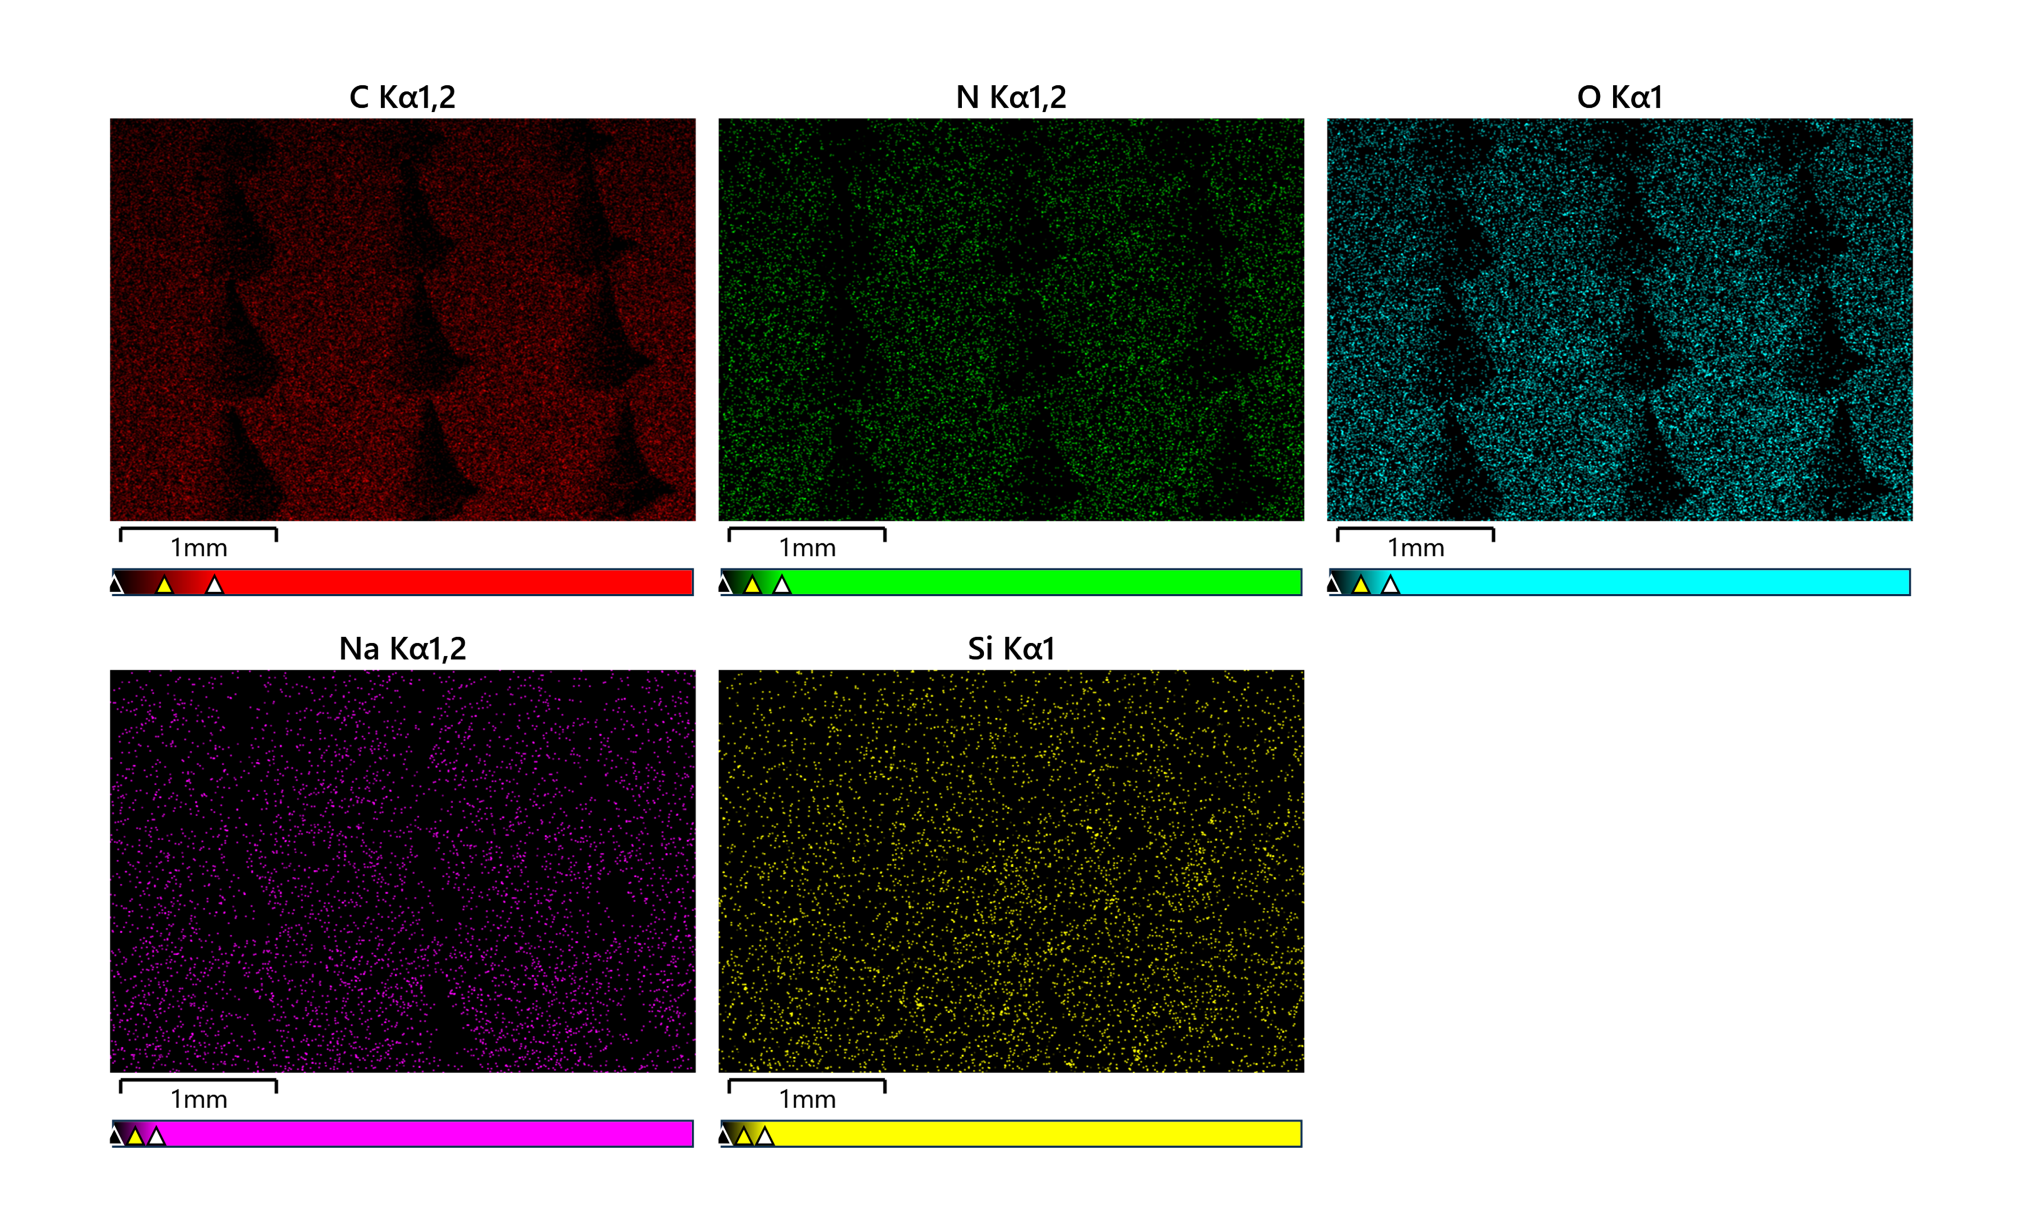


Fig. S2: Surface elemental analysis of MN@Ple/ExoQ10 patch (Scale bar: 1 mm).


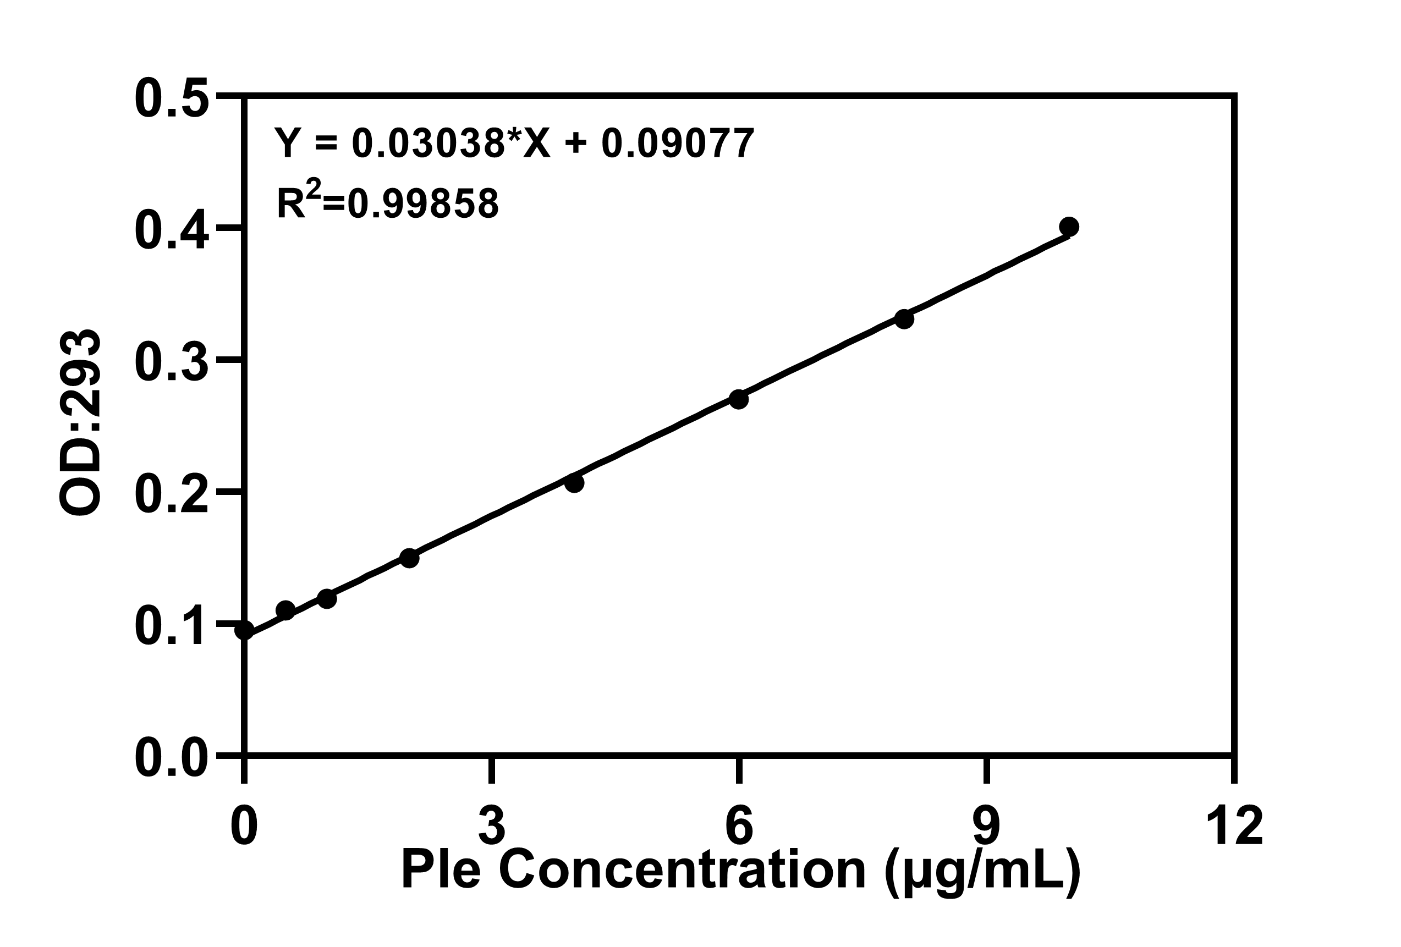


Fig. S3: Standard curve for Ple release.


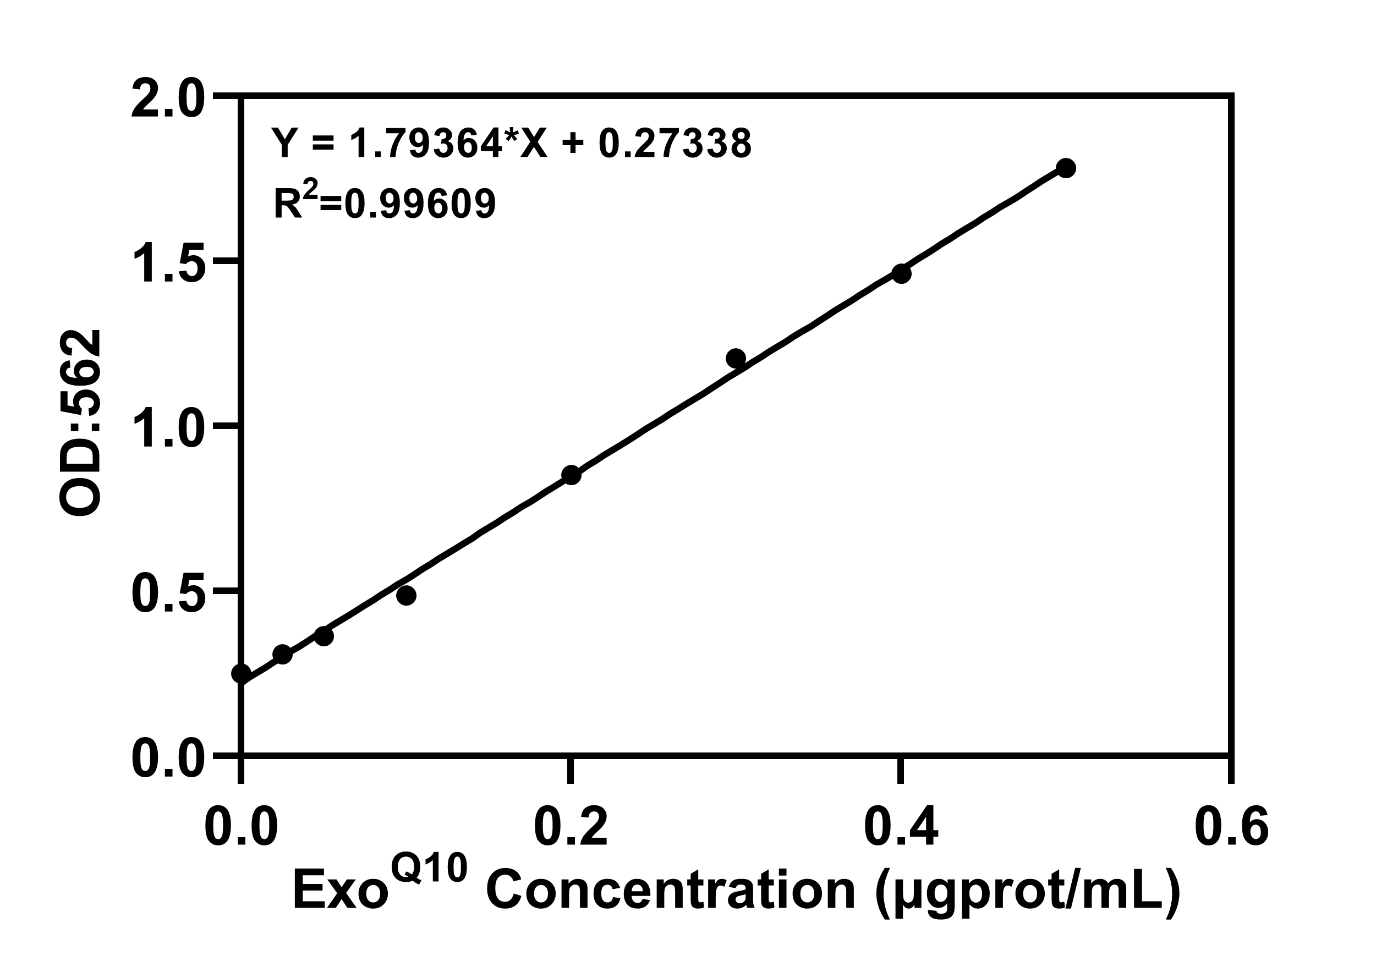


Fig. S4: Standard curve for ExoQ10 release.


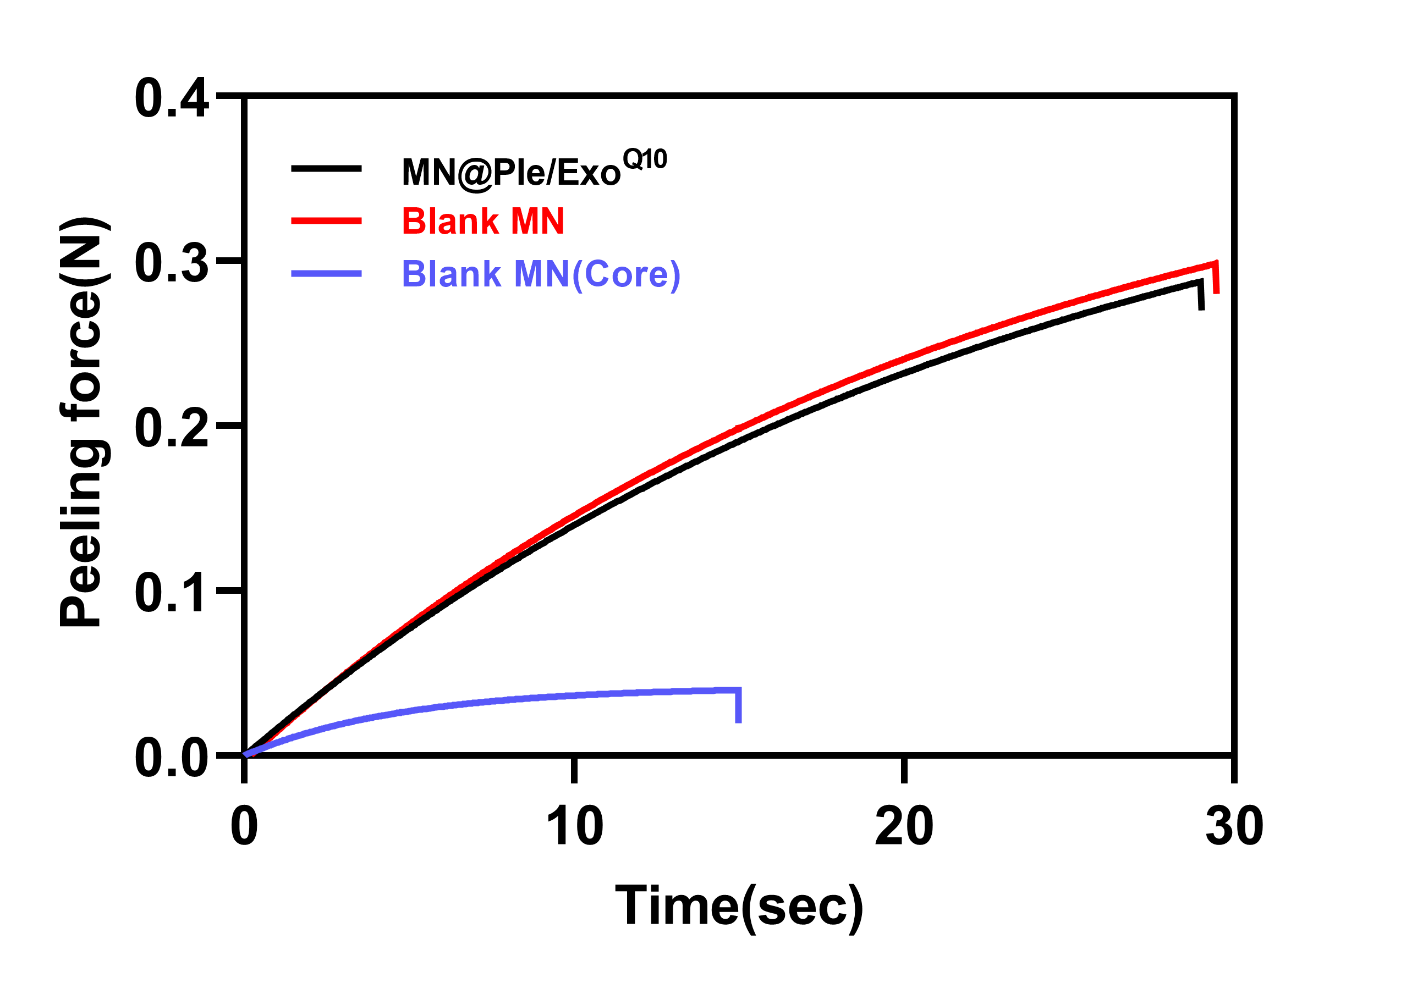


Fig. S5: The adhesion strength of MN patches in various groups.


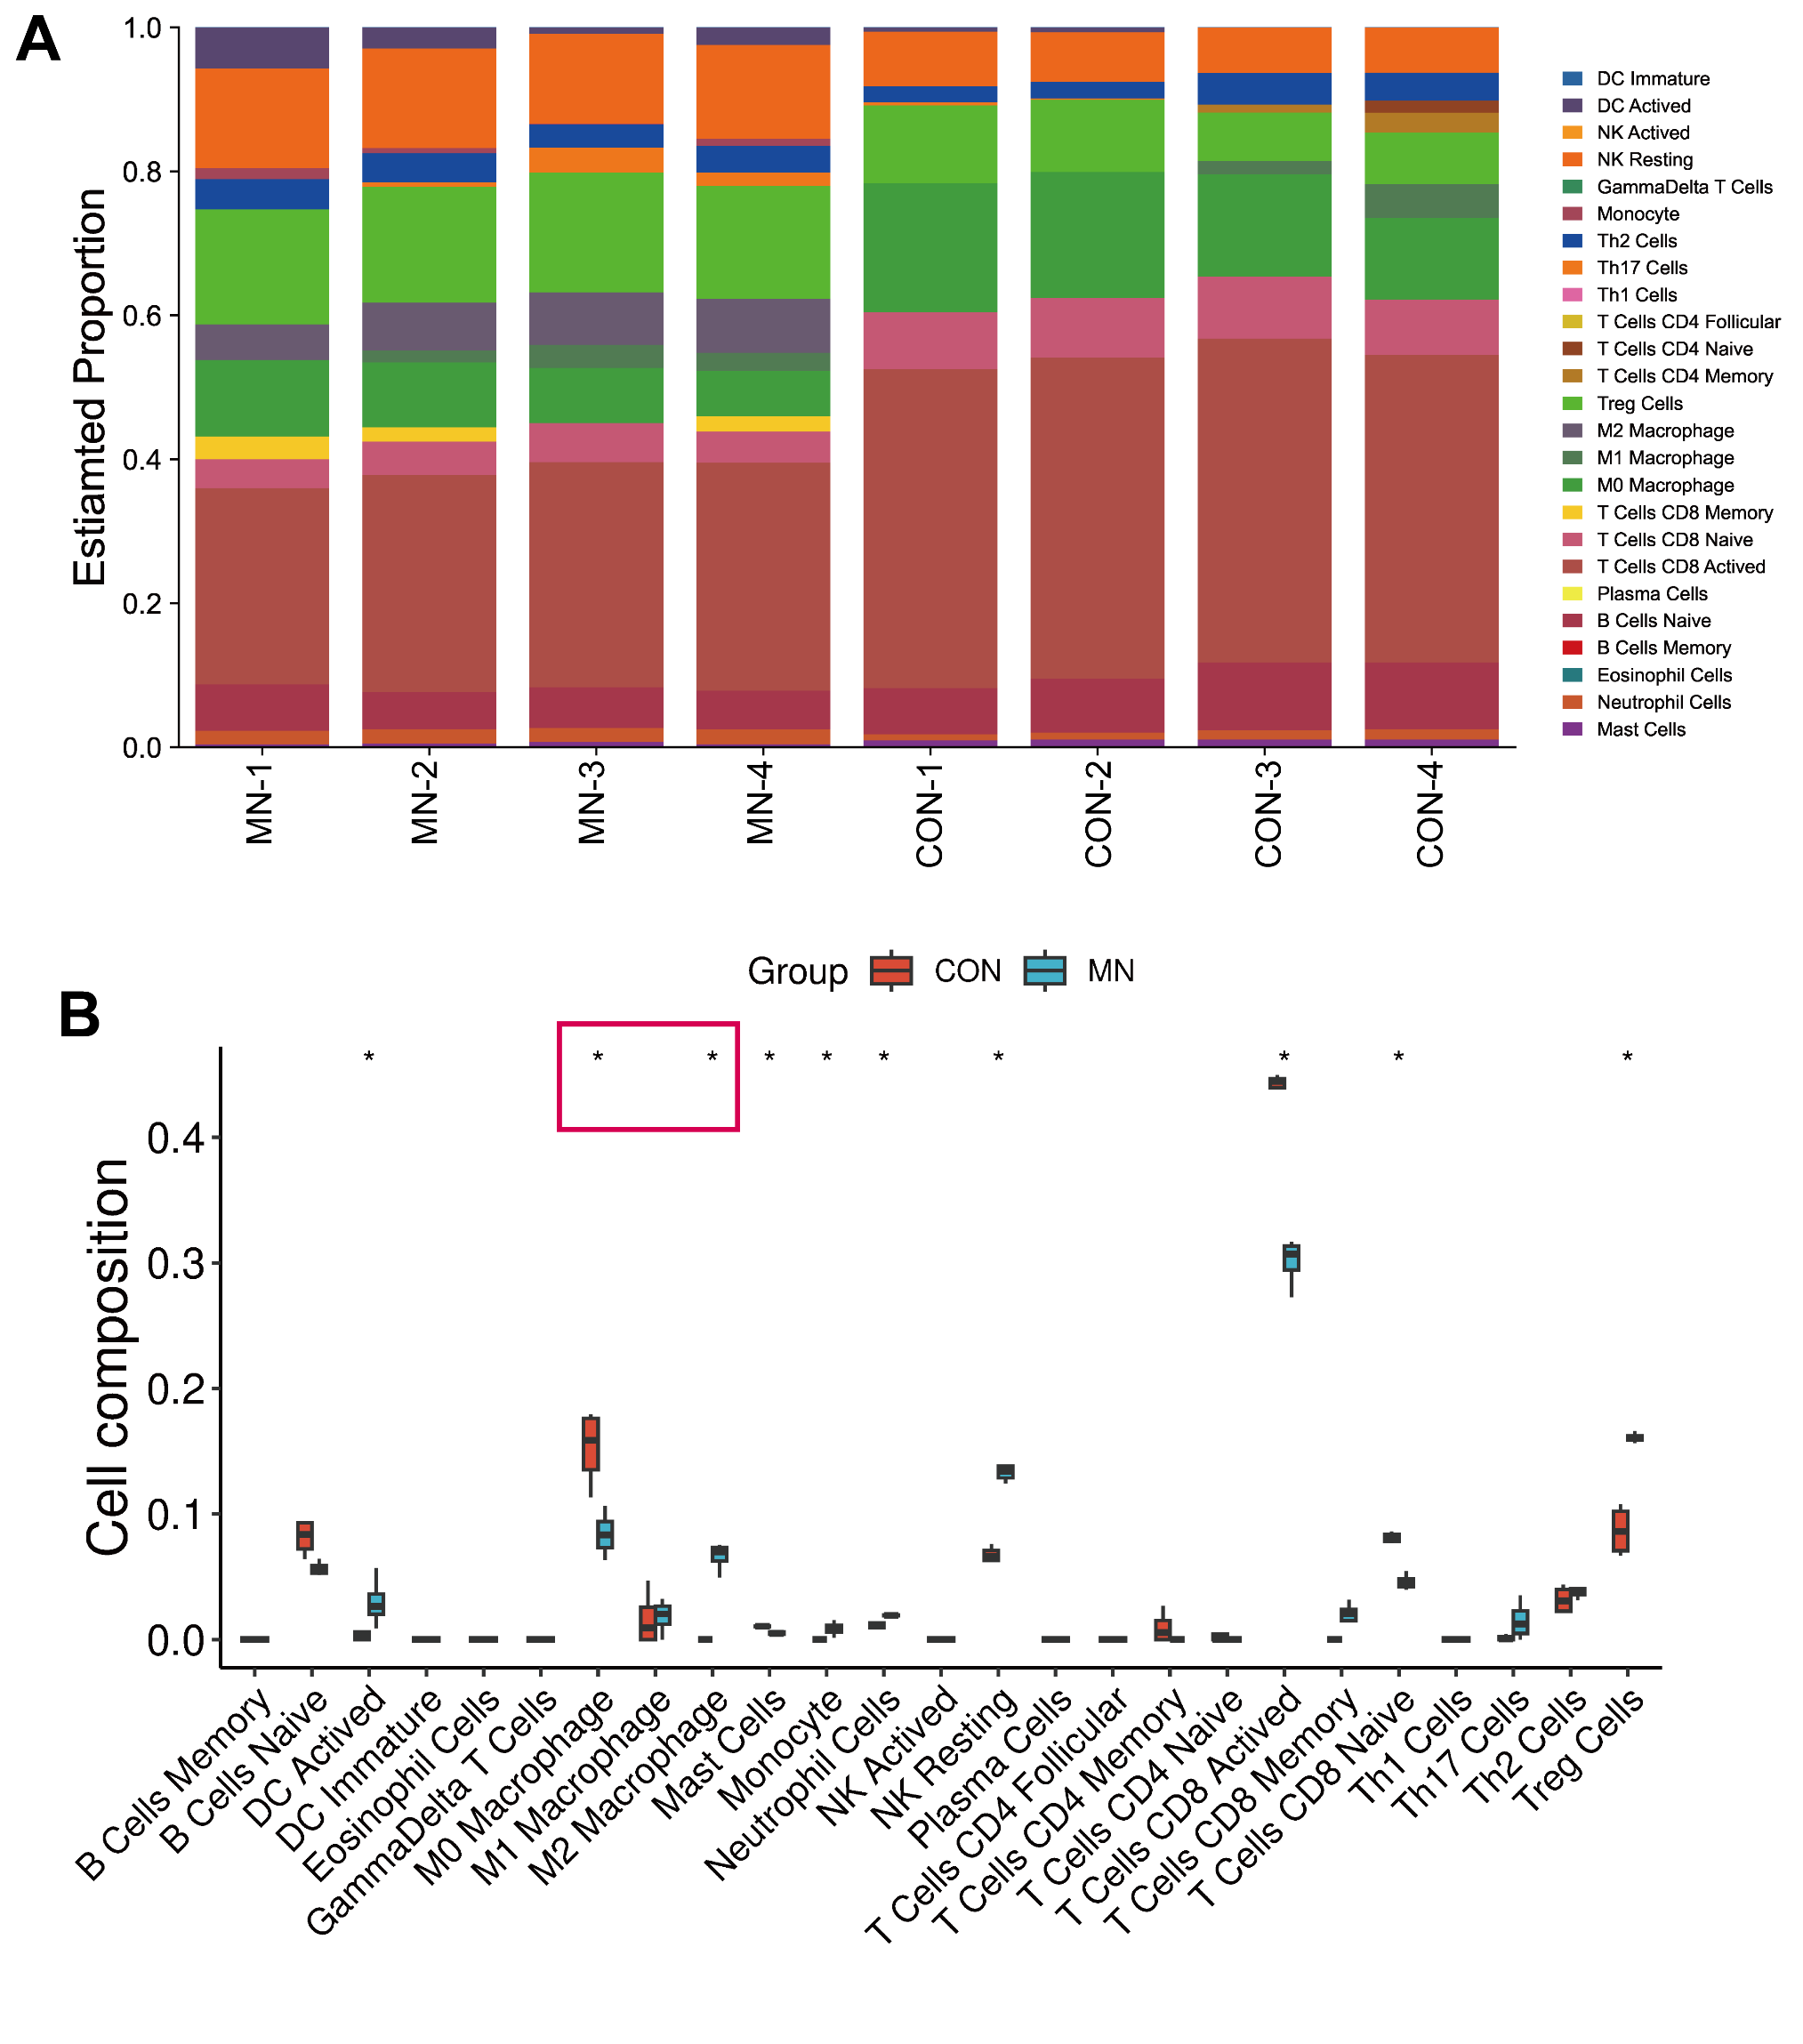


Fig. S6: CIBERSORT quantitative immune infiltration analysis. (A) Sample immune microenvironment composition characteristic stack diagram. (B) Intergroup immune component difference box diagram. (*P< 0.01)


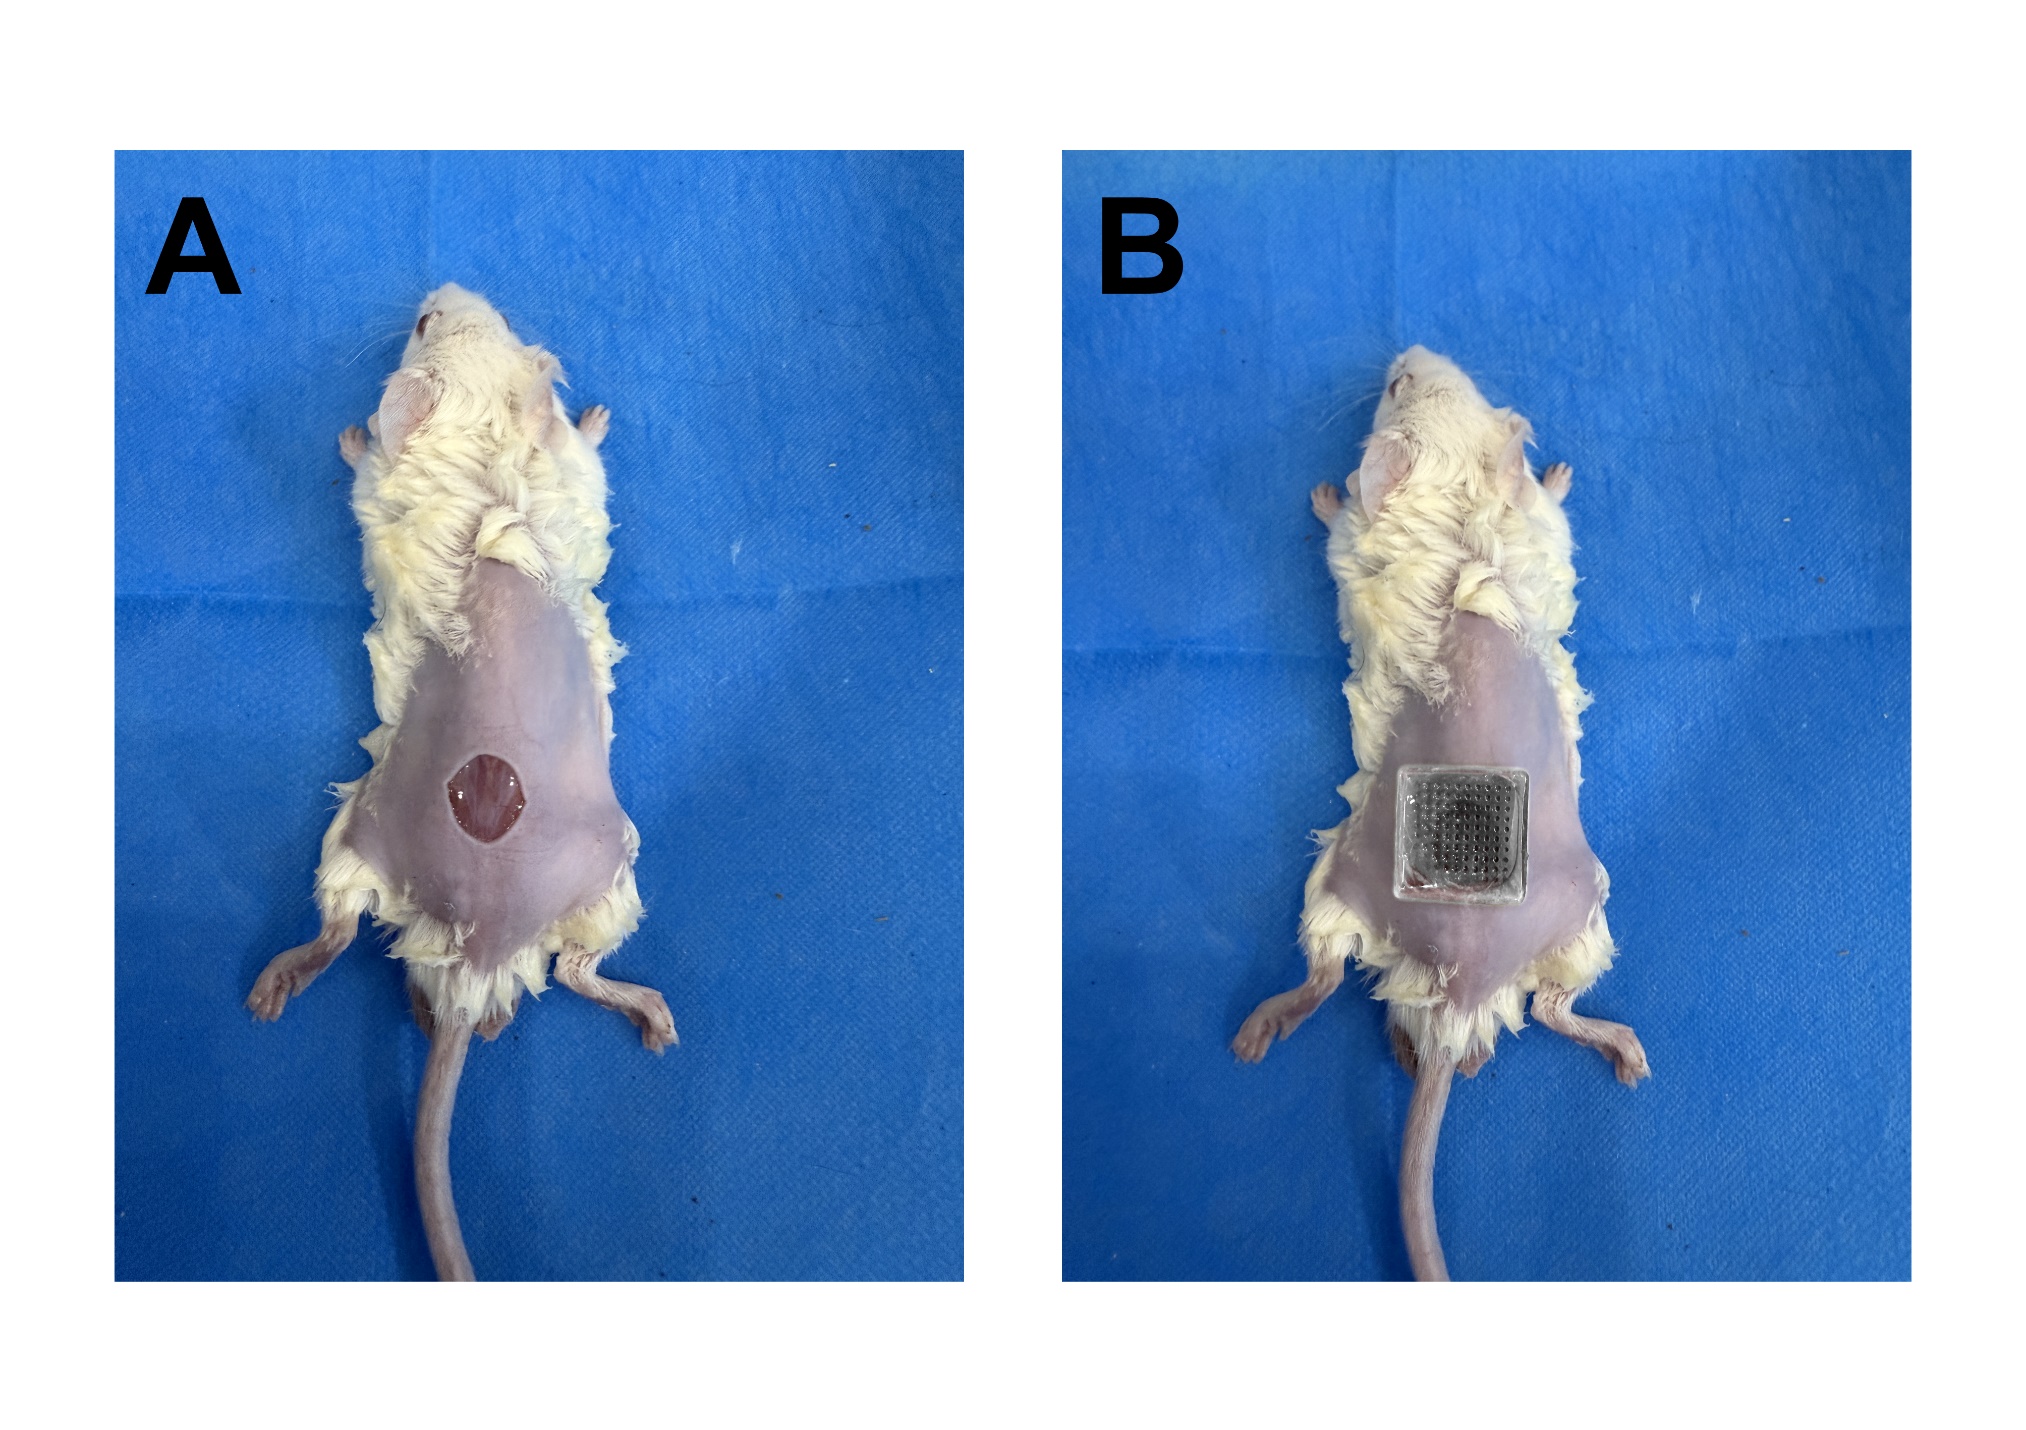


Fig. S7: Schematic illustration of MN patch in treating full-thickness dorsal skin defect in diabetic mouse.


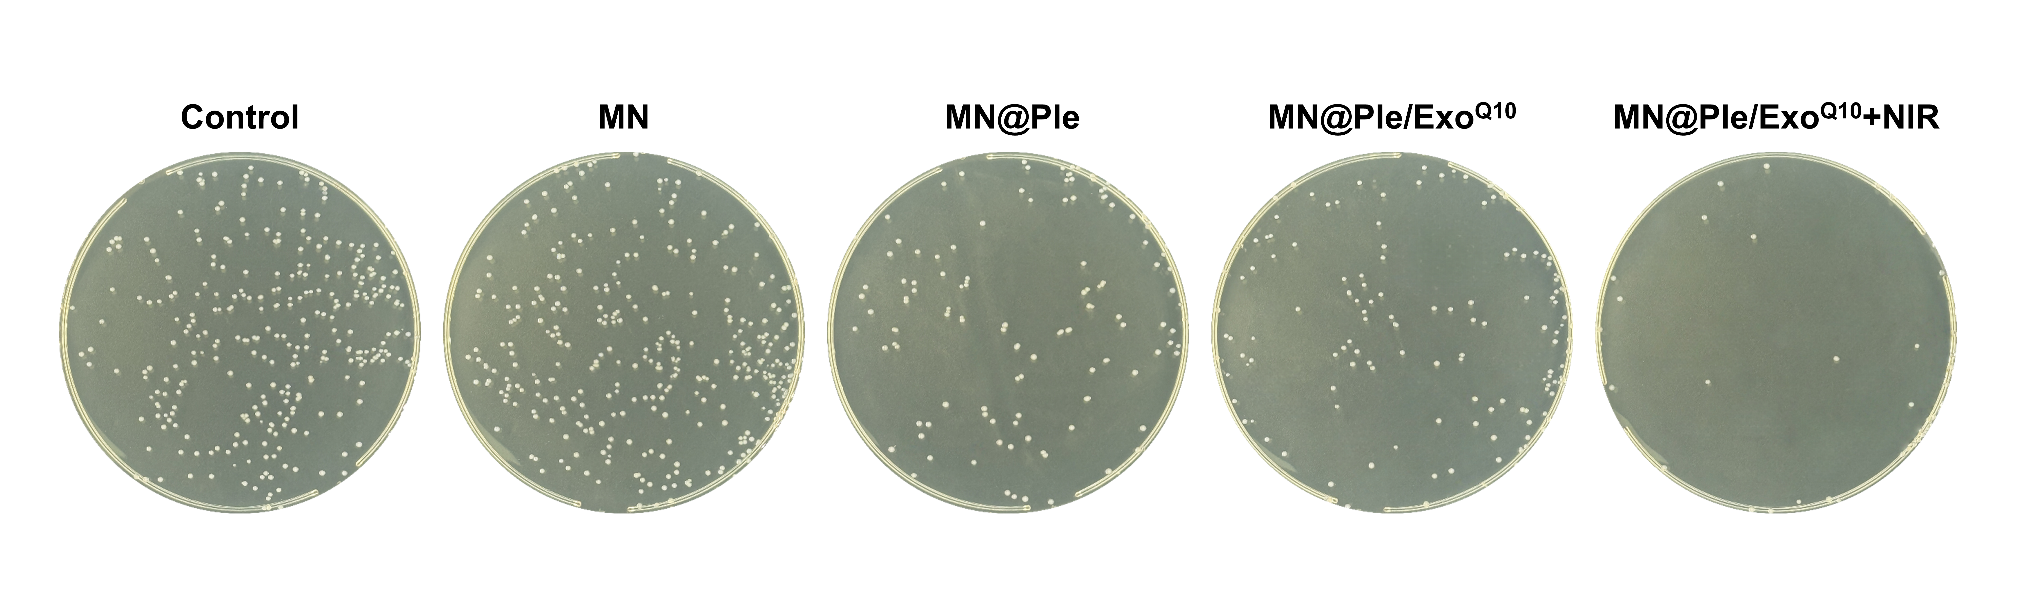


Fig. S8: Representative photographs of bacterial cultures from the skin tissue of diabetic mouse wounds treated with various groups (n = 5).


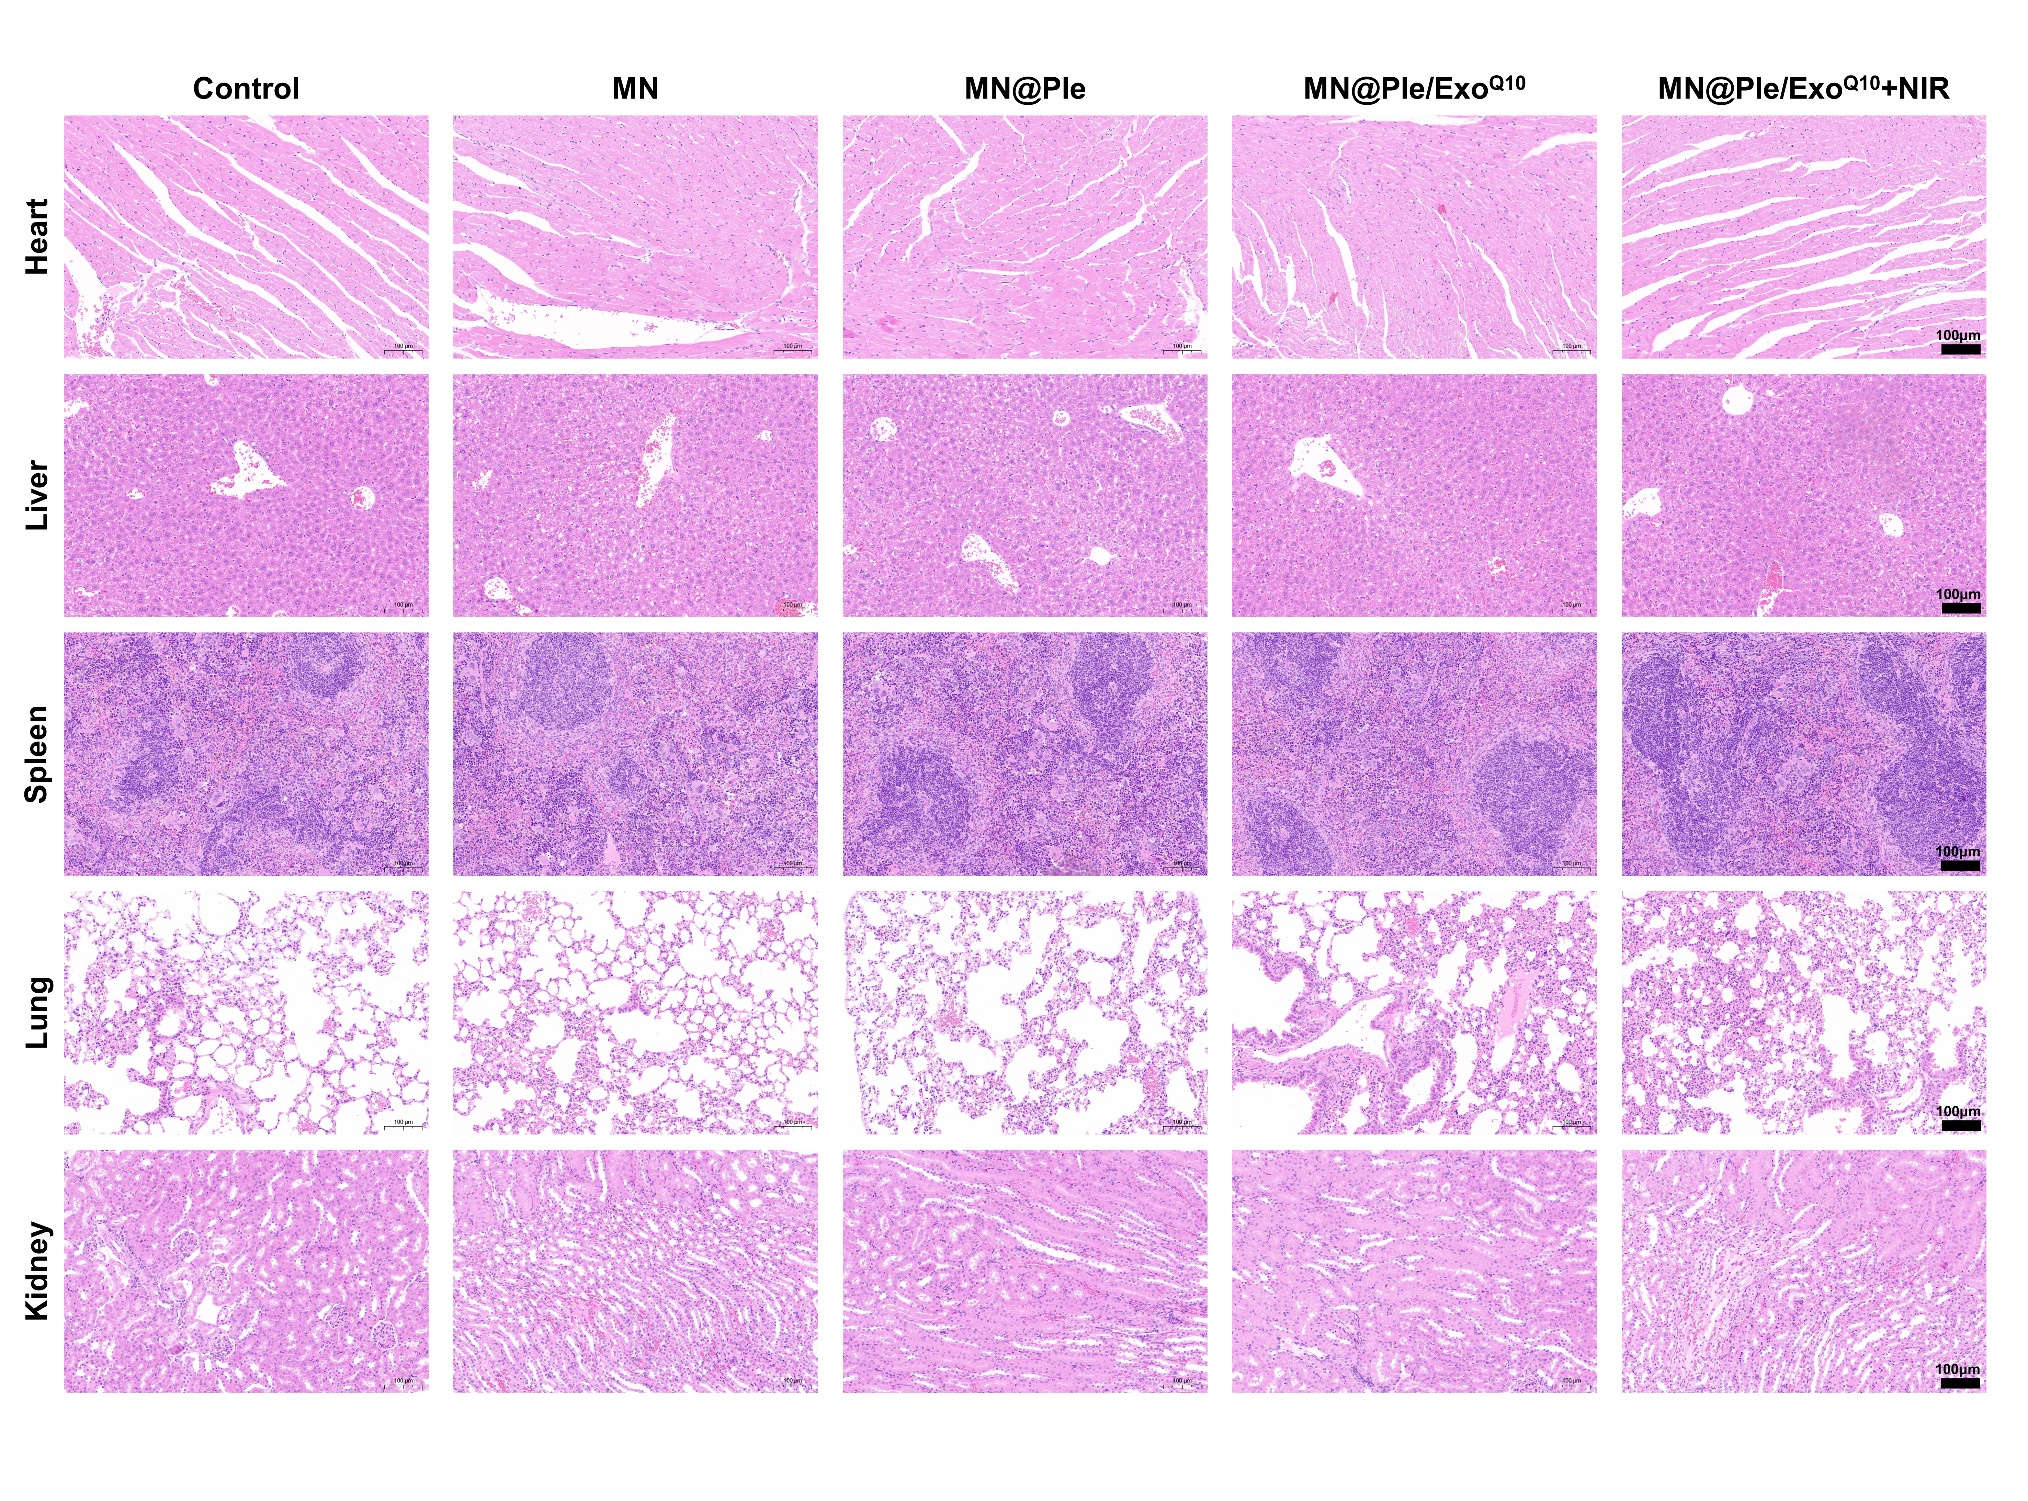


Fig. S9: HE staining results of major organs including heart, liver, spleen, lung and kidney (scale bar: 100 μm).

Table S1. The forward and reverse primer sequences used for qRT‐PCR.

| GPX | Forward: ACGCCAAAGTCCTAGGAAACG |
| --- | --- |
| Reverse: CCCCGGGTTGAAAGGTTCAG |
| SLC7A11 | Forward: CTGCAGCTAACTGACTGCCC |
| Reverse: ATCACCGACTGGCTCTACAC |
| ACSL4 | Forward: CTTCCTCTTAAGGCCGGGAC |
| Reverse: CTCTTTGCCATAGCGTTTTTAGA |
| LPCAT3 | Forward: CTACGATGGAGGCAAAGACGG |
| Reverse: CCAGCAATGAAGGGACACCC |
| TNF-α | Forward: CGCTCTTCTGTCTACTGAACTTCGG |
| Reverse: GTGGTTTGTGAGTGTGAGGGTCTG |
| IL6 | Forward: TGGTCTTCTGGAGTACCATAGC |
| Reverse: TGTGACTCCAGCTTATCTCTTGG |
| Arg-1 | Forward: CTCCAAGCCAAAGTCCTTAGAG |
| Reverse: GGAGCTGTCATTAGGGACATCA |
| IL4 | Forward: CCCCCAGCTAGTTGTCATCC |
| Reverse: TTTGGCACATCCATCTCCGT |
